# Supplementary material for: A highly active and magnetically retrievable nanoferrite–DOPA–copper catalyst for the coupling of thiophenols with aryl halides
Source: Royal Society of Chemistry journal article supplement (doi:10.1039/c2cc17283f), 2012-01-01

**Highly active and magnetically retrievable nanoferrite-DOPA-copper catalyst for the  
coupling of thiophenols with aryl halides**

R. B. Nasir Baig and Rajender S. Varma\*

*Sustainable Technology Division, National Risk Management Research Laboratory, U. S.  
Environmental Protection Agency, MS 443, Cincinnati, Ohio 45268, USA. Fax: 513- 569-7677;  
Tel: 513-487-2701.*

*E-mail: [varma.rajender@epa.gov](mailto:varma.rajender@epa.gov)*

**Supporting Information**

**Table of Contents**

|                                                                                  |                         |
|----------------------------------------------------------------------------------|-------------------------|
| <b>Experimental Procedures, Table</b>                                            | <b>Page Number 2-4</b>  |
| <b>TEM image, <sup>1</sup>H, and <sup>13</sup>C NMR spectra<br/>of compounds</b> | <b>Page Number 5-29</b> |

## Experimental section

### Synthesis of magnetic nano-ferrites

FeSO<sub>4</sub>·7H<sub>2</sub>O (13.9 g) and Fe<sub>2</sub>(SO<sub>4</sub>)<sub>3</sub> (20 g) were dissolved in 500 mL water in a 1000 mL beaker. Ammonium hydroxide (25%) was added slowly to adjust the pH of the solution to 10. The reaction mixture was then continually stirred for 1 h at 60 °C. The precipitated nanoparticles were separated magnetically, washed with water until the pH reached 7, and then dried under vacuum at 60 °C for 2 h. Ferrite was characterized by X-ray diffraction (XRD) and transmission electron microscopy (TEM). This magnetic nano-ferrite (Fe<sub>3</sub>O<sub>4</sub>) was then used for further chemical modification.

### Surface modification of nano-ferrites (nano-FeDOPA)

Nano-Fe<sub>3</sub>O<sub>4</sub> (2 gm) was dispersed in 25 mL water by sonication for 30 min. Dopamine hydrochloride (1 gm) dissolved in 5 mL of water was added to this solution and again sonicated for 2 h. The amine-functionalized nanomaterial was then precipitated using acetone, isolated by centrifugation, and dried under vacuum at 60 °C for 2 h.

### Synthesis of nano-FeDOPACu, catalyst

Amine-functionalized nano-Fe<sub>3</sub>O<sub>4</sub> (1 gm) was dispersed in water-methanol mixture (1:1). CuCl<sub>2</sub>·2H<sub>2</sub>O (100 mg) solution in water was added to the reaction mixture. Hydrazine monohydrate solution in water was added drop wise to bring the pH of this mixture to 9, followed by the addition of 0.1 gm of NaBH<sub>4</sub>. The reaction mixture was then stirred for 24 h at room temperature. The product was allowed to settle, washed several times with water and acetone, and dried under vacuum at 60 °C for 2 h. Catalyst characterization by X-ray diffraction (XRD) (Fig. 1d) and transmission electron microscopy (TEM) (Fig. 1c) confirm the anchoring of Cu nanoparticles on ferrite surfaces. The weight percentage of Cu in the catalyst was found to be 0.82% by ICP-AES analysis.

### Synthesis of diary sulfide

Aryl halide (1.0 mmol), thiophenol (1.2 mmol) and nano-FeDOPACu catalyst (100 mg) were placed in a crimp-sealed thick-walled glass tube equipped with a pressure sensor and a magnetic stirrer. Isopropanol (5 mL) was added to the reaction mixture. The reaction tube was placed inside the cavity of a CEM Discover focused microwave synthesis system, operated at 120 °C (temperature monitored by a built-in infrared sensor), 100 Watts and 10–60 psi for 25-45 min (Table 3). After completion of the reaction, the catalyst was easily removed from reaction

mixture using an external magnet. After separation of catalyst, the solid product was filtered off or extracted with ethyl acetate and purified by column chromatography.

All products listed in Table 3 are known in the literature and were identified by comparison of their FT-IR,  $^1\text{H}$ , and  $^{13}\text{C}$  NMR with literature data.<sup>1-6</sup> The  $^1\text{H}$  and  $^{13}\text{C}$  NMR spectra for all the compound (Table 3) is given below.

References:

1. S. M. Agawane and J. M. Nagarkar, *Tetrahedron Lett.*, 2011, **52**, 5220.
2. K. Swapna, S. N. Murthy, M. T. Jyothi and Y. V. D. Nageswar, *Org. Biomol. Chem.*, 2011, **9**, 5989.
3. V. K. Akkilagunta and R. R. Kakulapati, *J. Org. Chem.*, 2011, **76**, 6819.
4. X. Y. Zhang, X. Y. Zhang, and S. R. Guo., *Journal of Sulfur Chemistry*, 2011, **32**, 23.
5. H. J. Yoon, J. W. Choi, H. Kang, T. Kang, S. M. Lee, B. H. Jun, Y. S. Lee, *Synlett*, 2010, 2518.
6. (a) Y. Zhang, K. N. Ngeow and J. Y. Ying, *Org. Lett.*, 2007, **9**, 3495; (b) A. Saxena, A. Kumar and S. Mozumdar, *Appl. Catal., A*, 2007, **317**, 210; (c) S. Jammi, P. Barua, L. Rout, P. Saha and T. Punniyamurthy, *Tetrahedron Lett.*, 2008, **49**, 1484; (d) H. J. Cristau, B. Chabaud, A. Chene and H. Christol, *Synthesis*, 1981, 892; (e) C. Millois and P. Diaz, *Org. Lett.*, 2000, **2**, 1705; (f) V. Percec, J.-Y. Bae and D. H. Hill, *J. Org. Chem.*, 1995, **60**, 6895; (g) K. Takagi, *Chem. Lett.*, 1987, 2221.

**Table 1** Optimization of reaction condition

| Entry | Solvent            | Base                            | Temp   | Times  | Yield <sup>a</sup> |
|-------|--------------------|---------------------------------|--------|--------|--------------------|
| 1     | H <sub>2</sub> O   | NaOH                            | 100 °C | 24 h   | -                  |
| 2     | H <sub>2</sub> O   | K <sub>2</sub> CO <sub>3</sub>  | 100 °C | 24 h   | -                  |
| 3     | H <sub>2</sub> O   | Cs <sub>2</sub> CO <sub>3</sub> | 100 °C | 24 h   | -                  |
| 4     | DMF                | K <sub>2</sub> CO <sub>3</sub>  | 153 °C | 24 h   | 70%                |
| 5     | DMF                | Cs <sub>2</sub> CO <sub>3</sub> | 153 °C | 24 h   | 70%                |
| 6     | THF                | K <sub>2</sub> CO <sub>3</sub>  | 65 °C  | 24 h   | 65%                |
| 7     | THF                | Cs <sub>2</sub> CO <sub>3</sub> | 65 °C  | 24 h   | 66%                |
| 8     | CH <sub>3</sub> CN | K <sub>2</sub> CO <sub>3</sub>  | 82 °C  | 24 h   | 63%                |
| 9     | CH <sub>3</sub> CN | Cs <sub>2</sub> CO <sub>3</sub> | 82 °C  | 24 h   | 65%                |
| 10    | THF:iPrOH          | K <sub>2</sub> CO <sub>3</sub>  | reflux | 24 h   | 77%                |
| 11    | THF:iPrOH          | Cs <sub>2</sub> CO <sub>3</sub> | reflux | 24 h   | 76%                |
| 12    | iPrOH              | Cs <sub>2</sub> CO <sub>3</sub> | 82 °C  | 24 h   | 79%                |
| 13    | iPrOH              | K <sub>2</sub> CO <sub>3</sub>  | 82 °C  | 24 h   | 81%                |
| 14    | iPrOH              | K <sub>2</sub> CO <sub>3</sub>  | 120 °C | 25 min | 98% <sup>b</sup>   |

a) Reaction condition: 1.2 mmol of thiophenol, 1.0 mmol of aryl halide, 100 mg of nano-FeDOPACu catalyst.  
 b) Reaction condition: 1.2 mmol of thiophenol, 1.0 mmol of aryl halide, 100 mg of nano-FeDOPACu catalyst.  
 MW, 120 °C, Power 100 Watt.

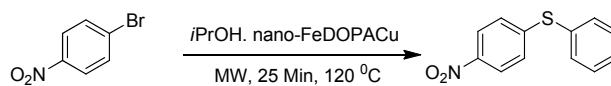

**Table 4** Recycling of catalyst

| No of cycles | Yield |
|--------------|-------|
| 1            | 98%   |
| 2            | 97%   |
| 3            | 97%   |

**Figure 1** TEM image of catalyst after three cycles

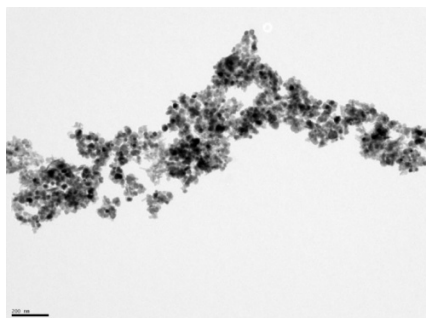

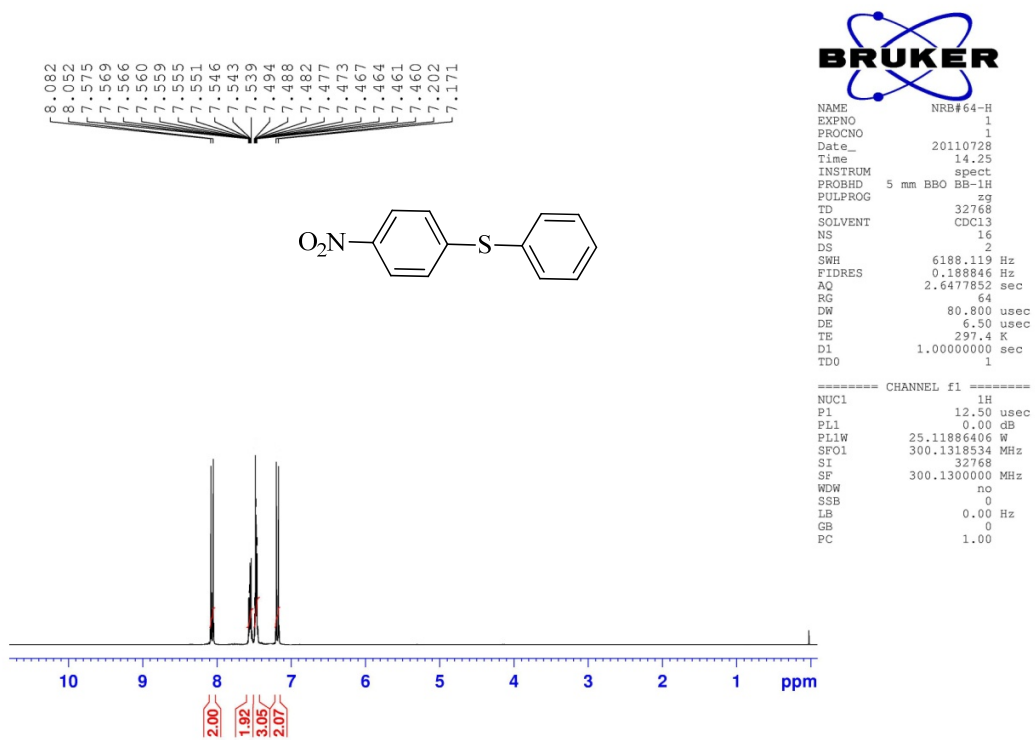

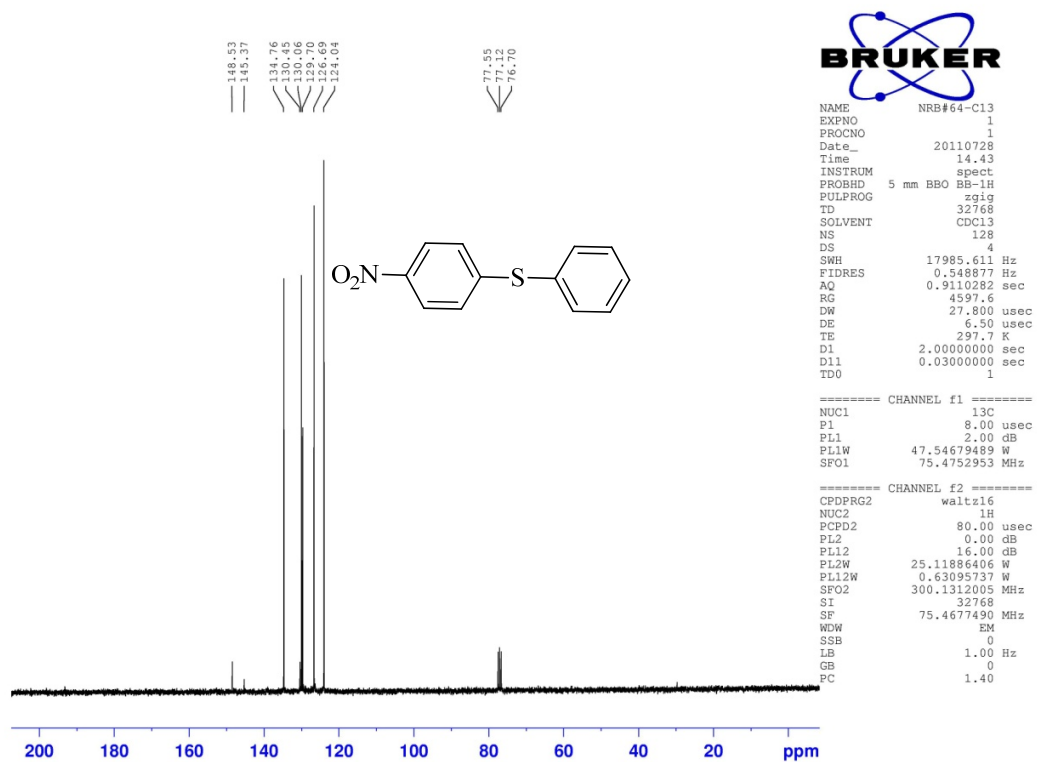

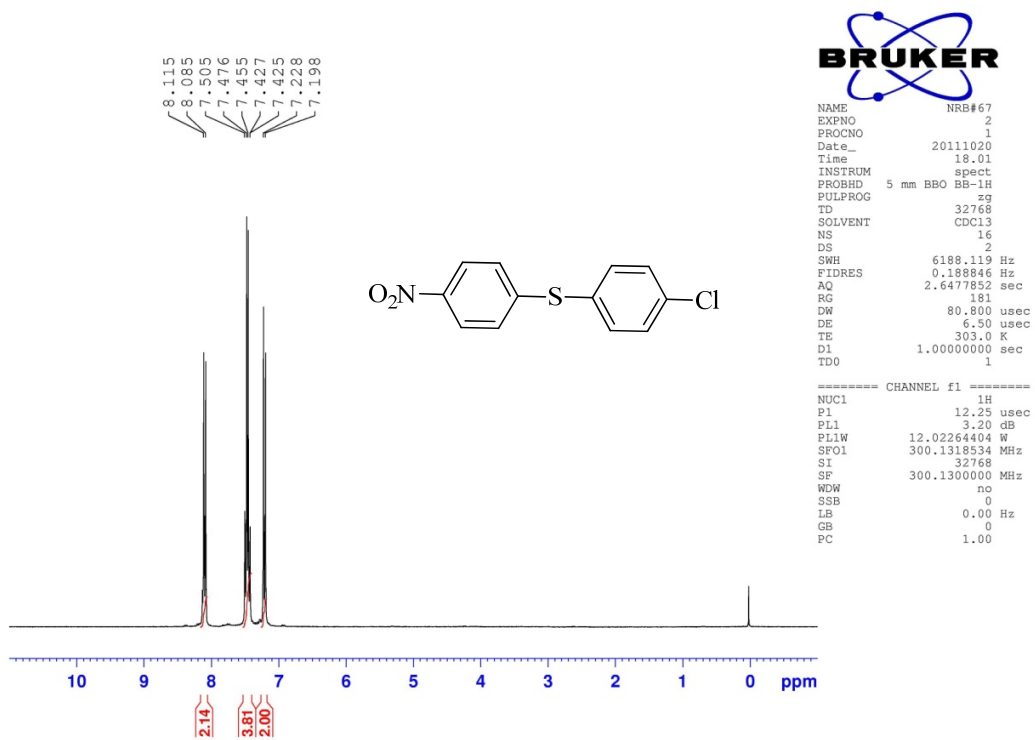



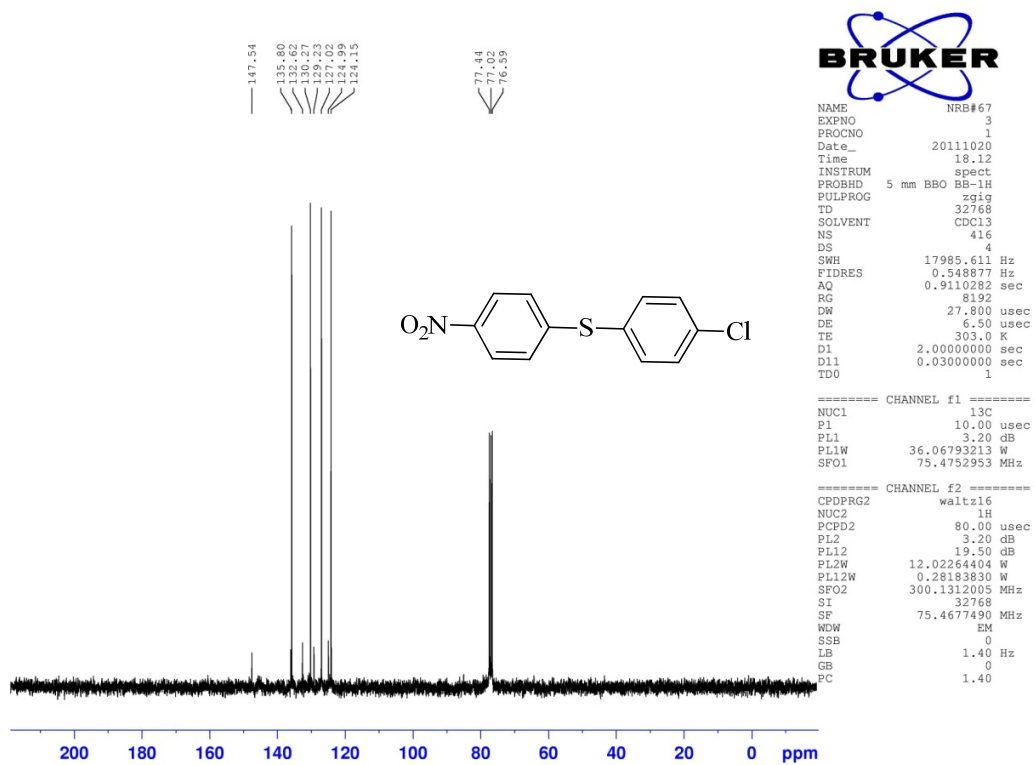

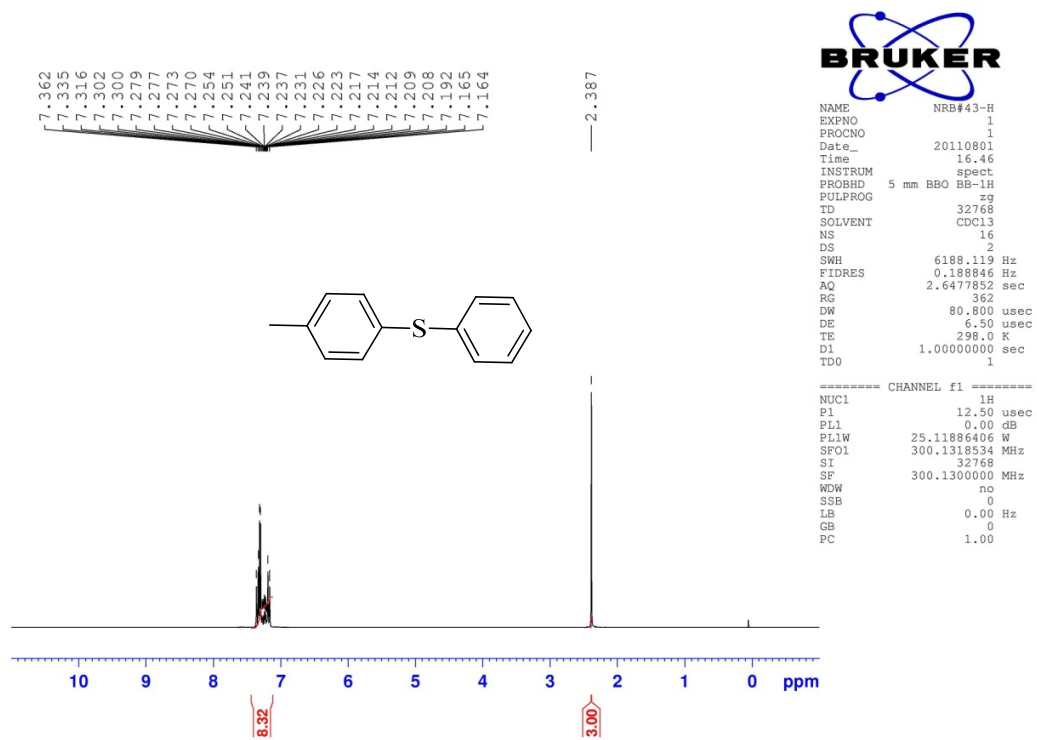

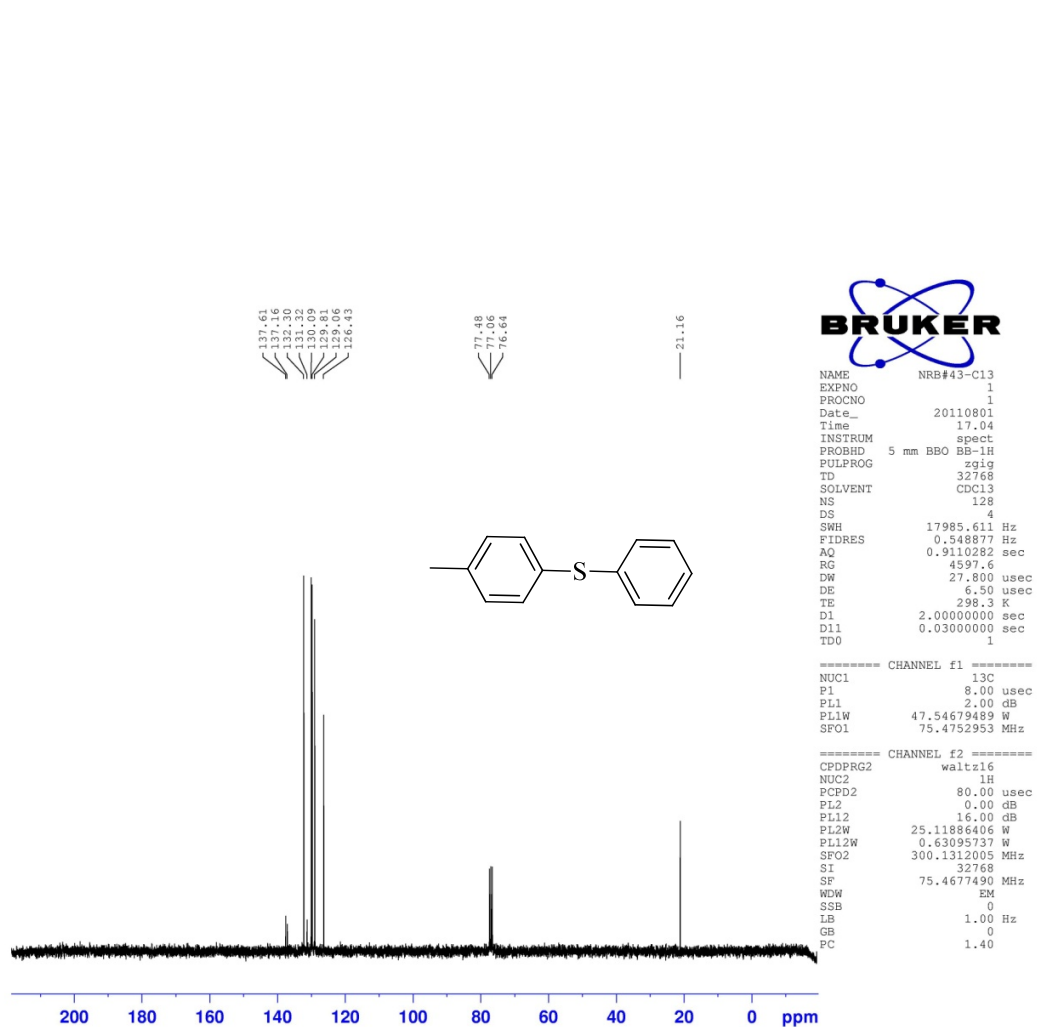

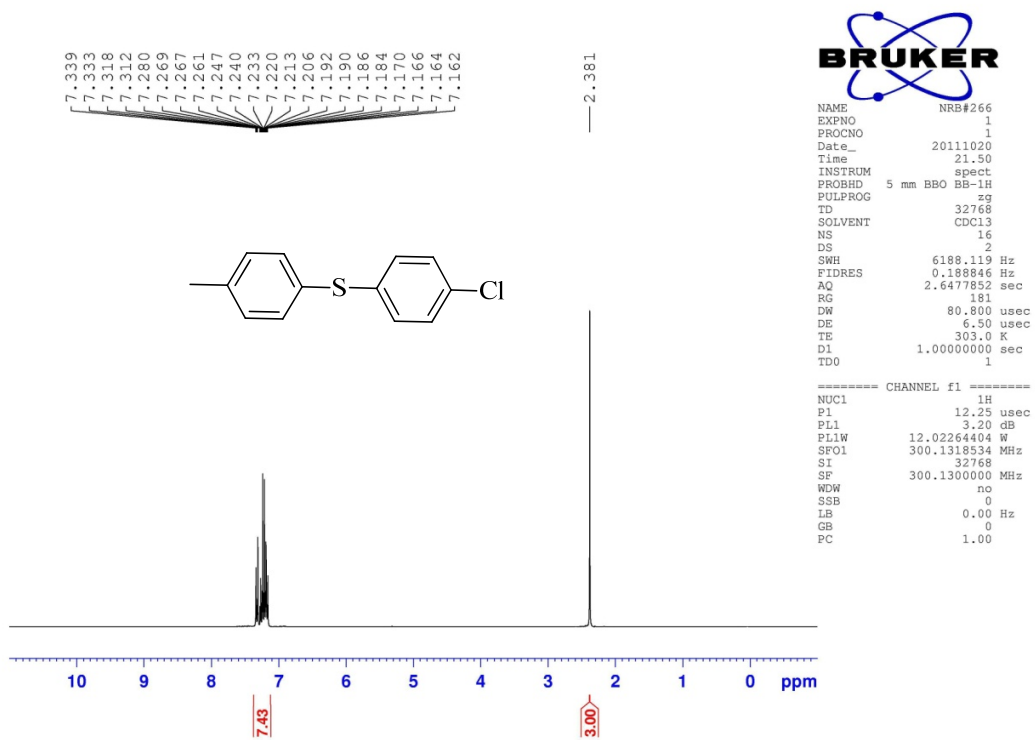

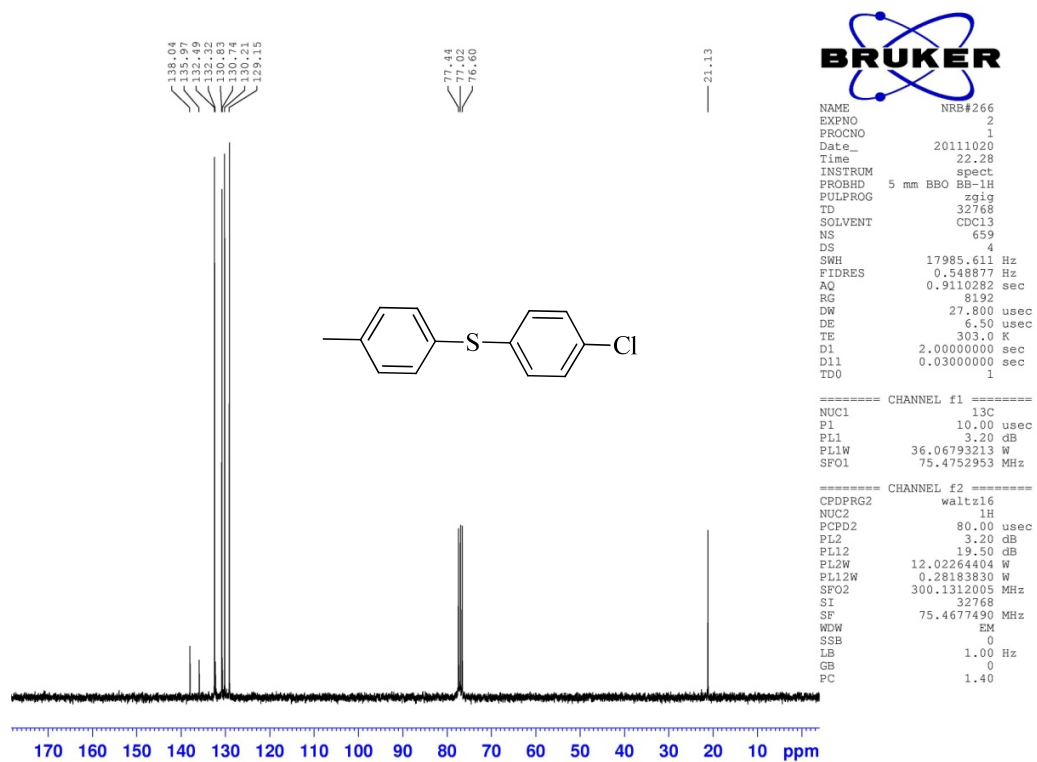

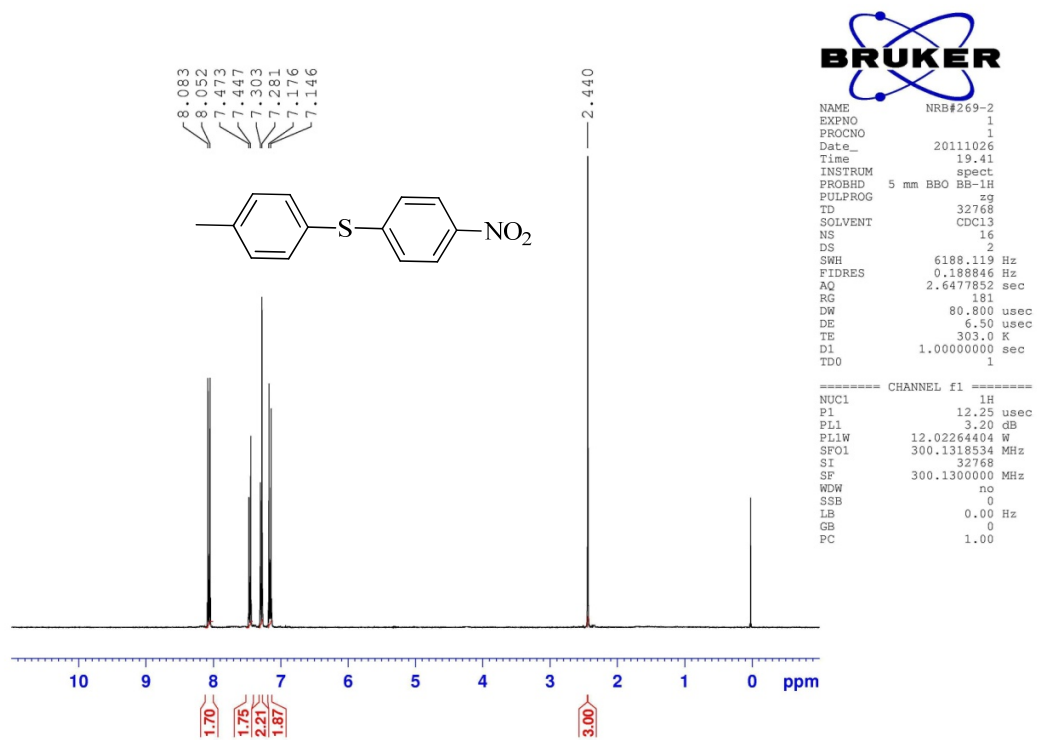

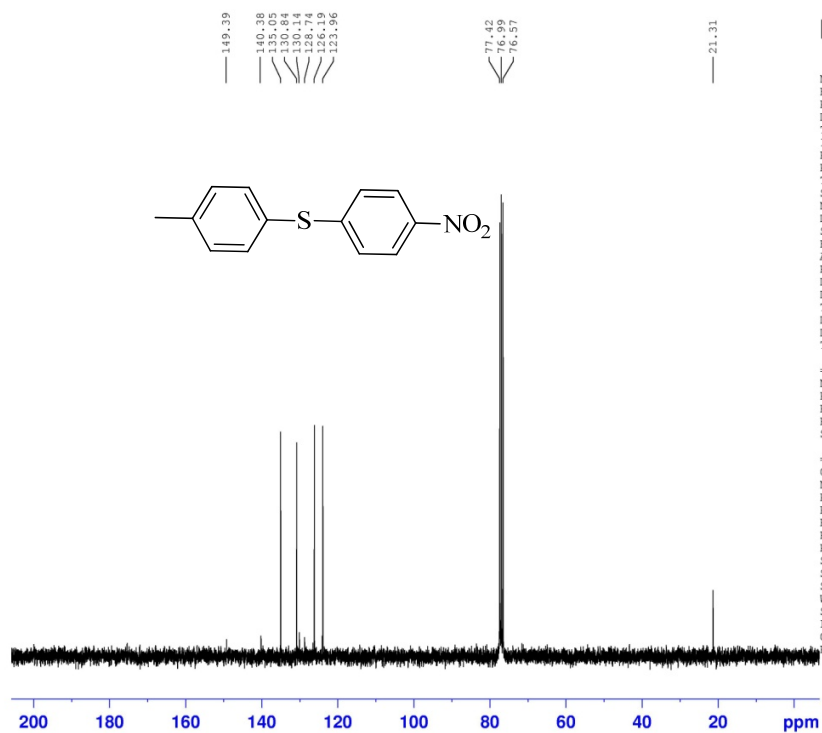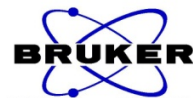

```
NAME NRB#269-2
EXPNO 2
PROCNO 1
Date_ 20111026
Time 20.35
INSTRUM spect
PROBHD 5 mm BBO BB-1H
PULPROG zgpg
TD 32768
SOLVENT CDCl3
NS 903
DS 4
SWH 17985.611 Hz
FIDRES 0.548877 Hz
AQ 0.9110282 sec
RG 8192
DW 27.800 usec
DE 6.30 usec
TE 303.0 K
D1 2.0000000 sec
D11 0.0300000 sec
TD0 1

===== CHANNEL f1 =====
NUC1 13C
P1 10.00 usec
PL1 3.20 dB
PL1W 36.06793213 W
SF01 75.4752953 MHz

===== CHANNEL f2 =====
CPDPRG2 waltz16
NUC2 1H
PCPD2 80.00 usec
PL2 3.20 dB
PL12 19.50 dB
PL2W 12.02264404 W
PL12W 0.28183830 W
SF02 300.1312005 MHz
SI 32768
SF 75.4677490 MHz
WDW EM
SSB 0
LB 1.00 Hz
GB 0
PC 1.40
```

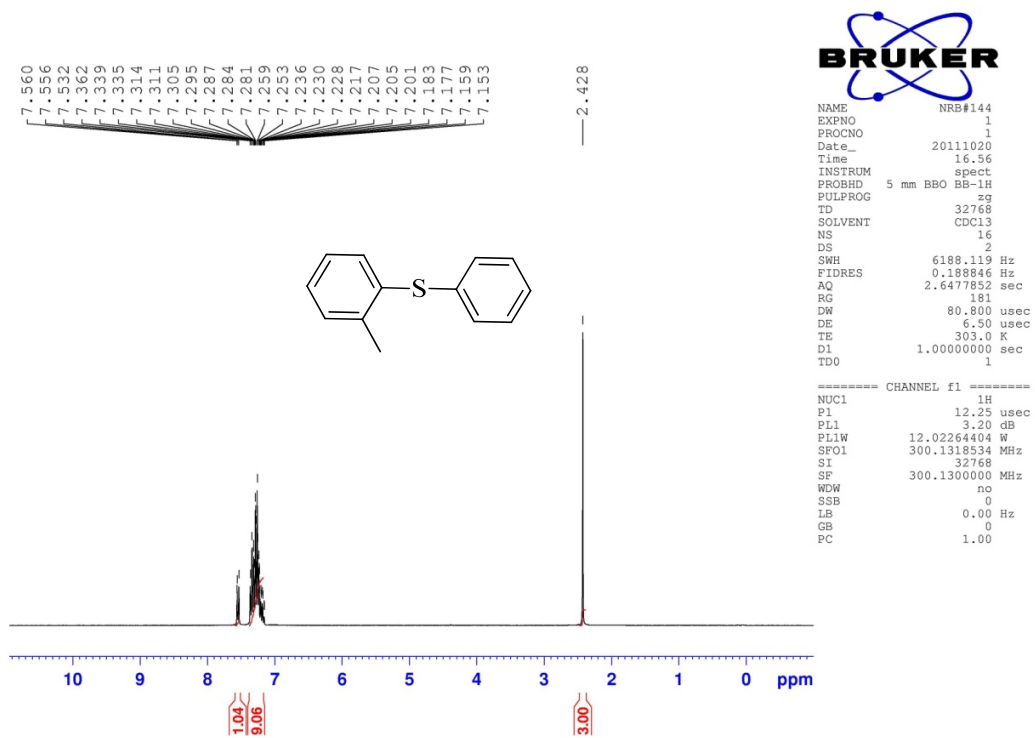



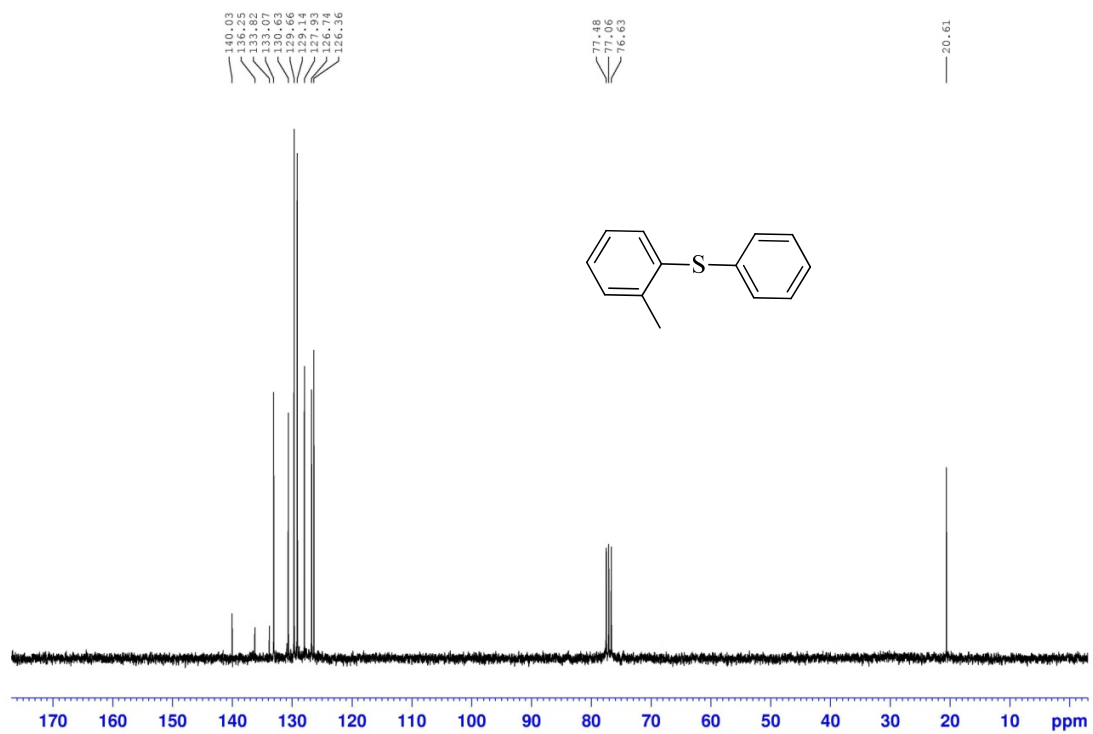

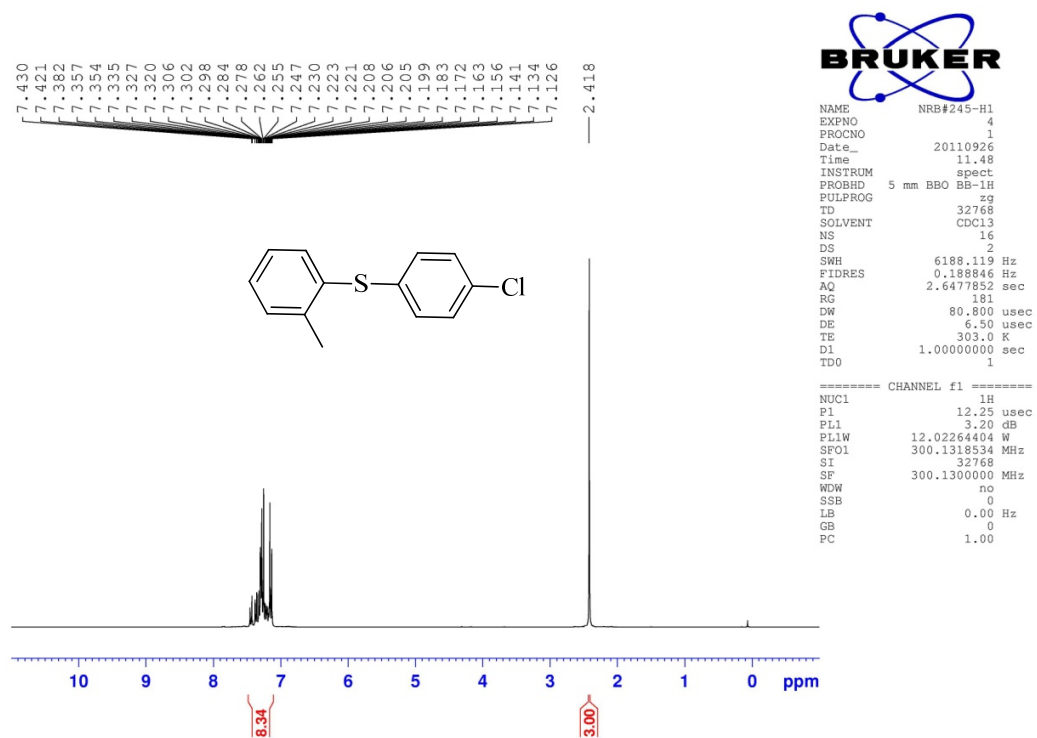

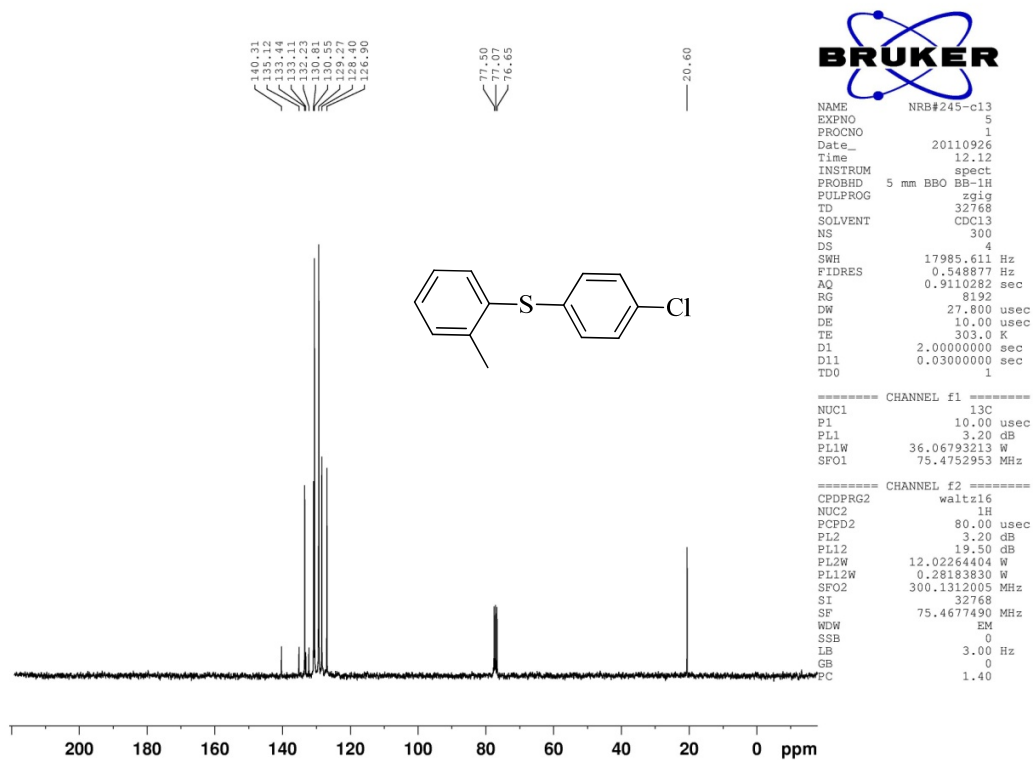

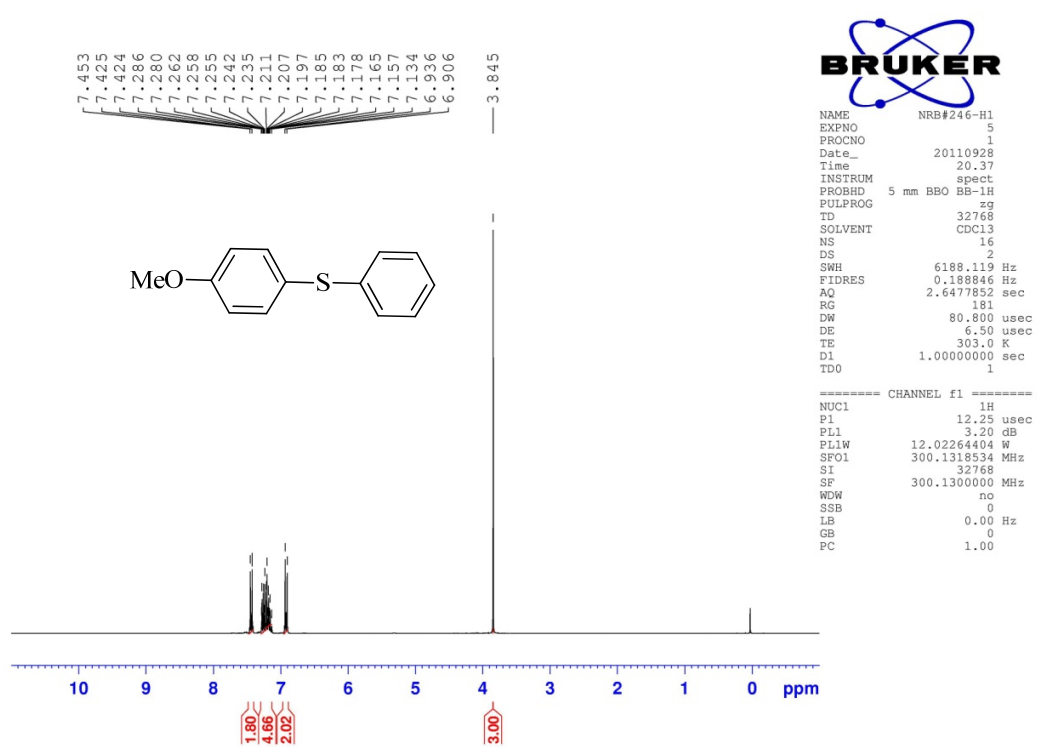

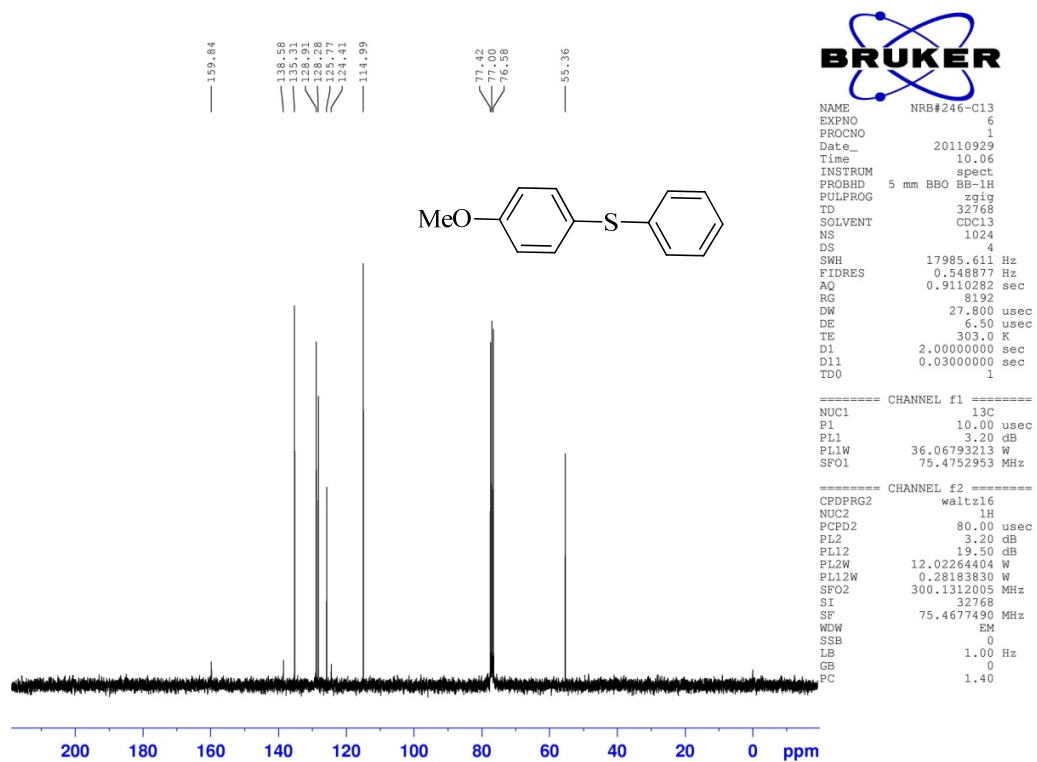

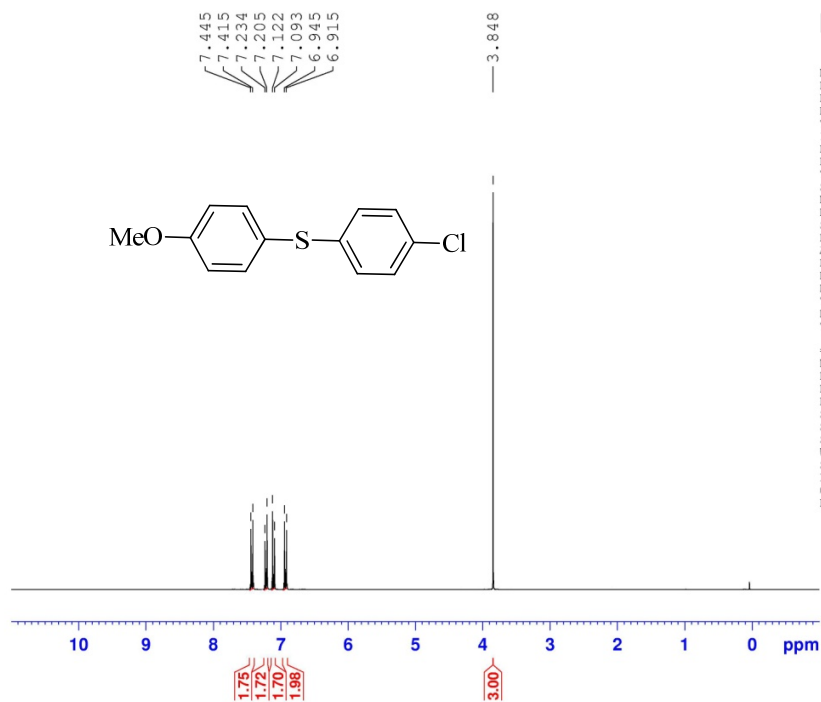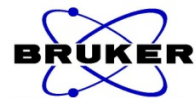

```
NAME NRB#247-H1
EXPNO 1
PROCNO 1
Date_ 20110927
Time 18.46
INSTRUM spect
PROBHD 5 mm BBO BB-1H
PULPROG zg
TD 32768
SOLVENT CDCl3
NS 16
DS 2
SWH 6188.119 Hz
FIDRES 0.188846 Hz
AQ 2.6477852 sec
RG 181
DW 80.800 usec
DE 6.50 usec
TE 303.0 K
D1 1.00000000 sec
TD0 1

===== CHANNEL f1 =====
NUC1 1H
P1 12.25 usec
PI1 3.20 dB
PL1W 12.02264404 W
SF01 300.1318534 MHz
SI 32768
SF 300.1300000 MHz
WDW no
SSB 0
LB 0.00 Hz
GB 0
PC 1.00
```

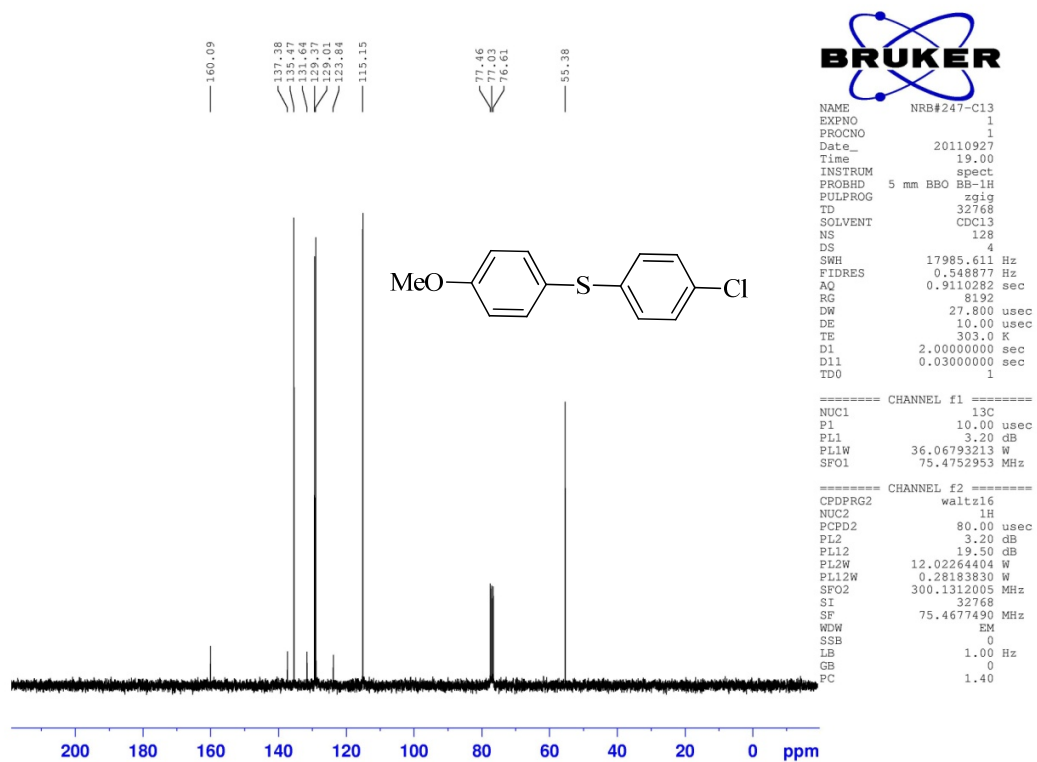

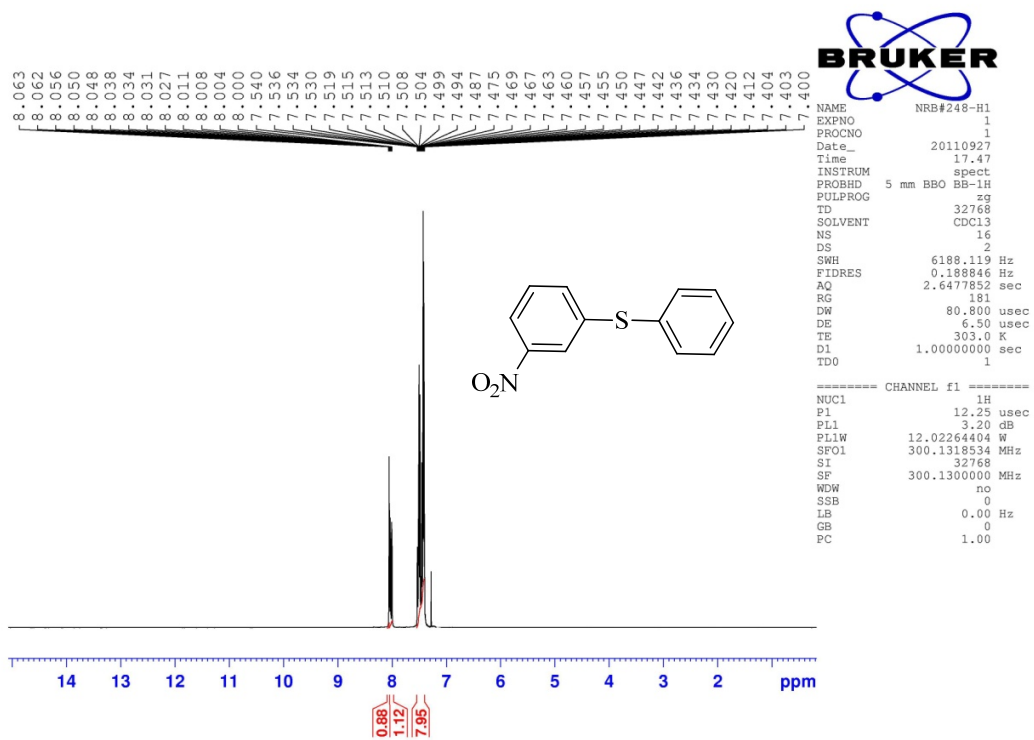



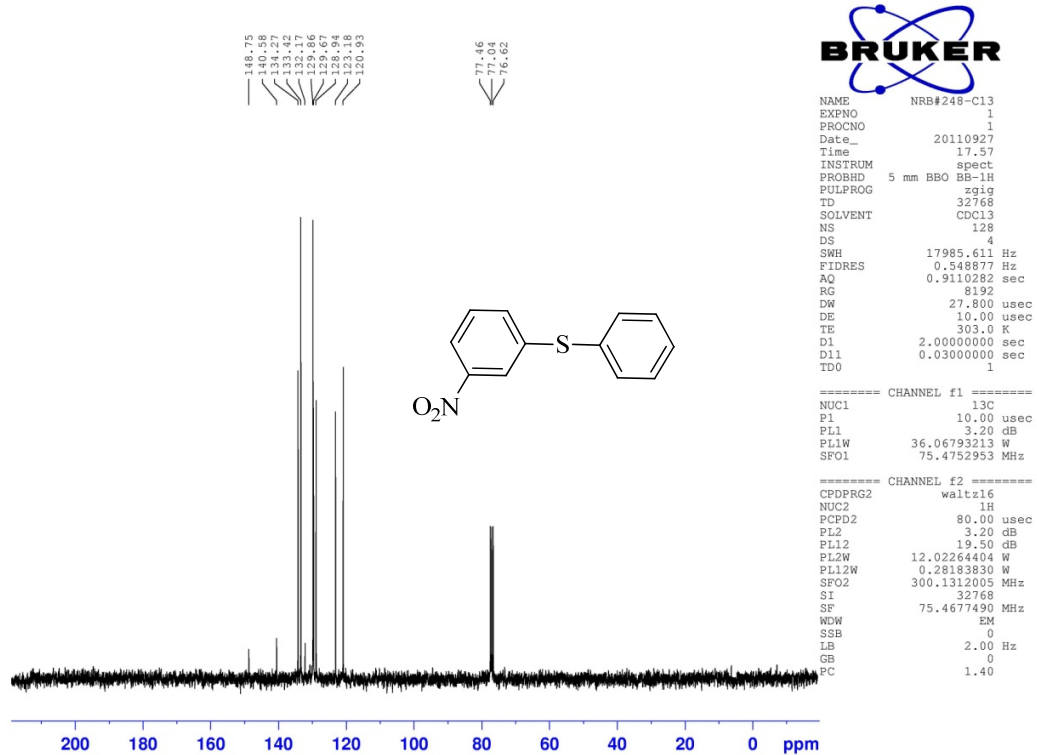

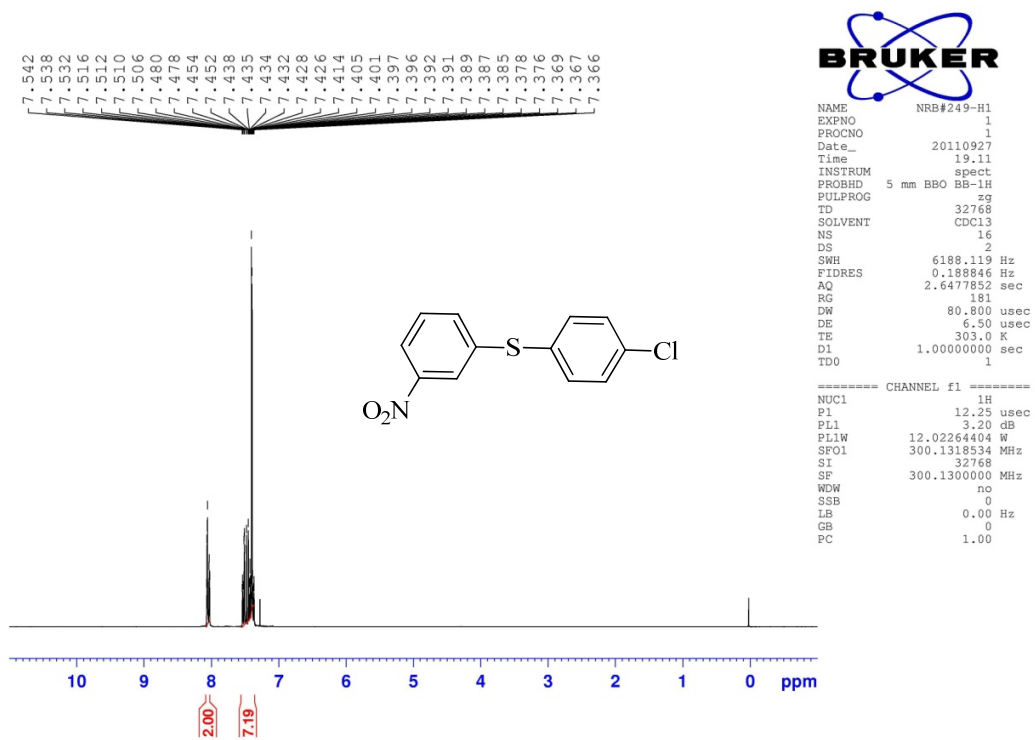

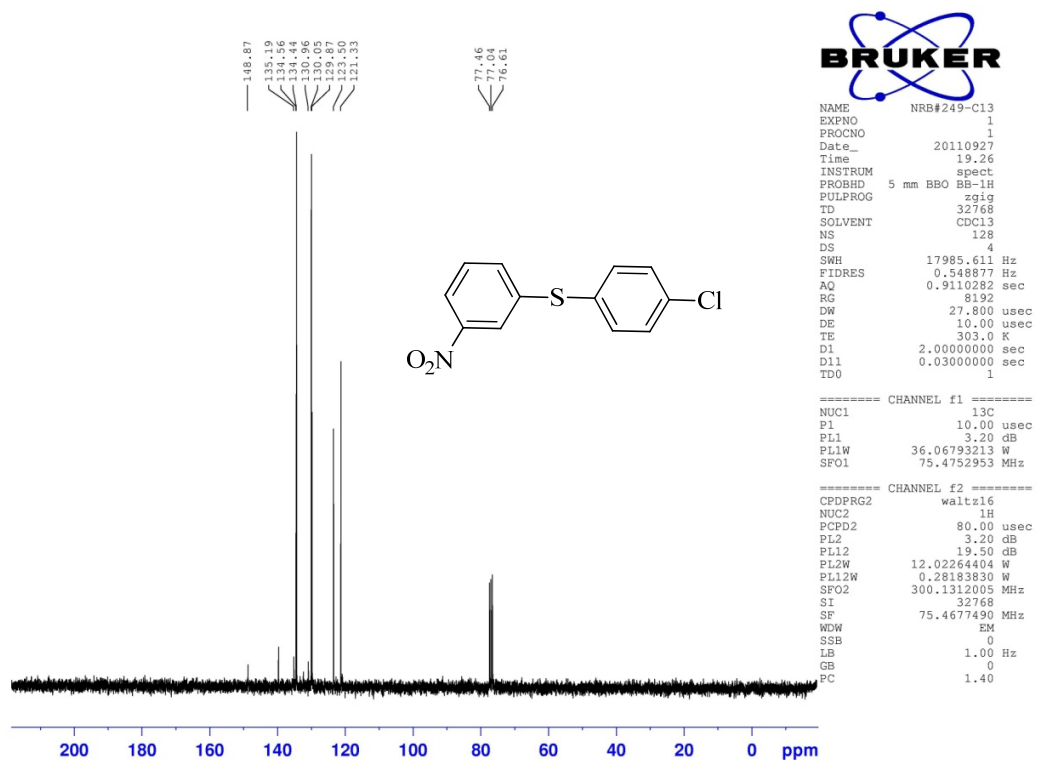

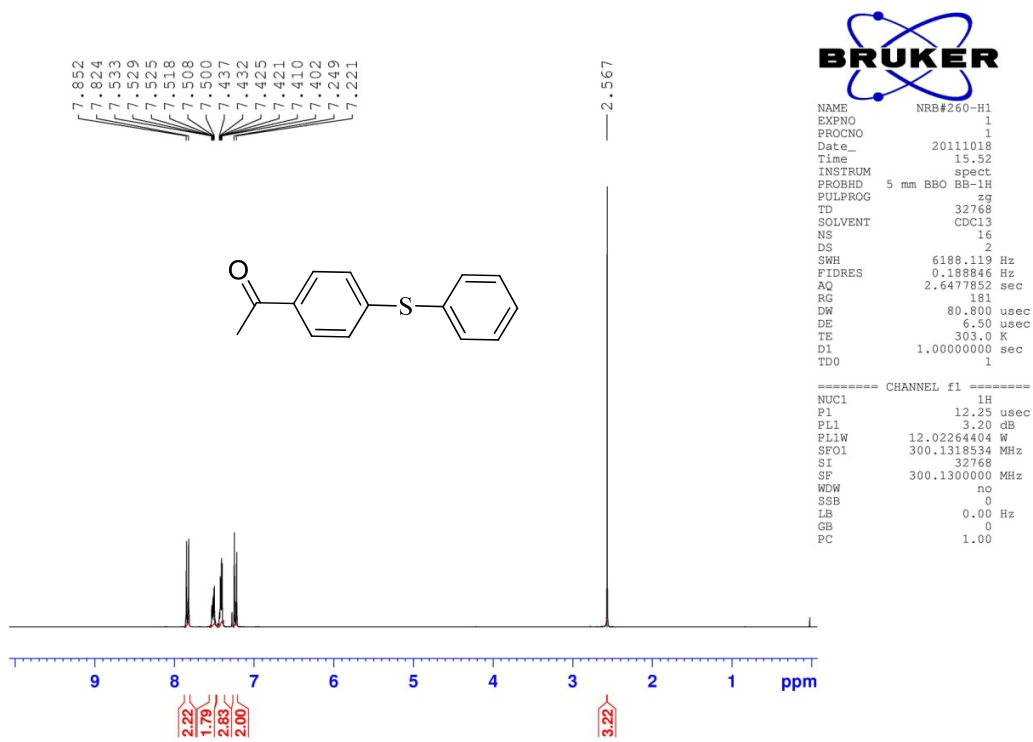

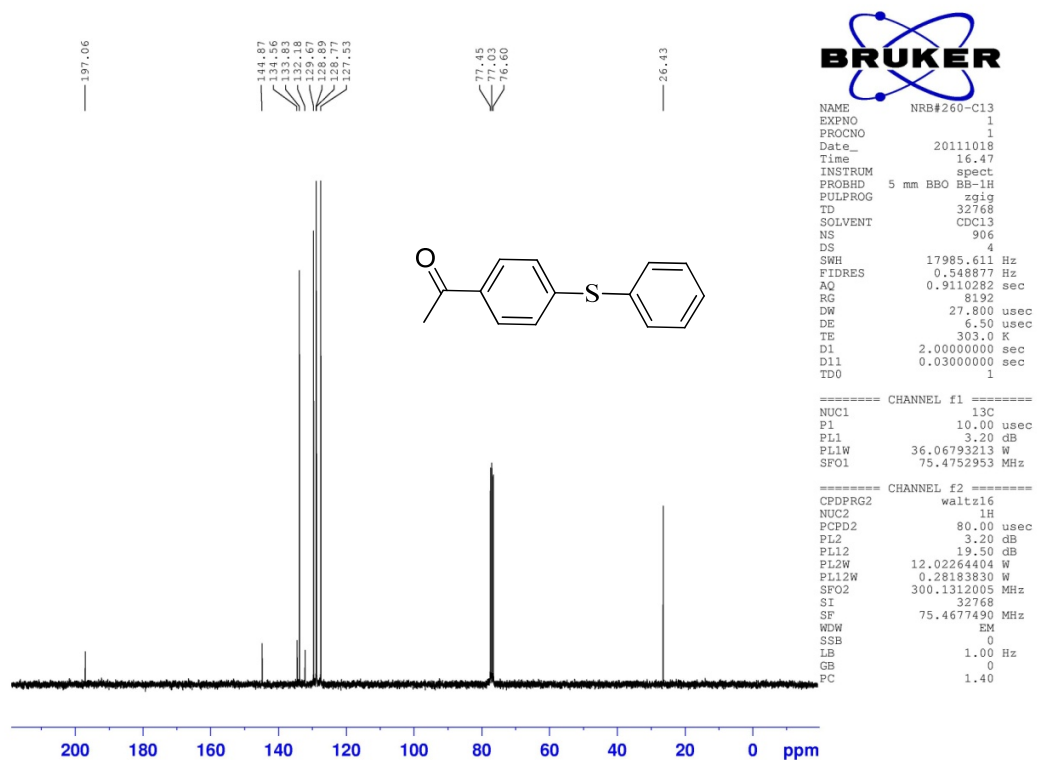

Supplement: c2cc17283f.pdf [file c2cc17283f.pdf]
